# Supplementary material for: A Spectroscopic Investigation of Eu3+ Incorporation in LnPO4 (Ln = Tb, Gd1-xLux, X = 0.3, 0.5, 0.7, 1) Ceramics
Source: Front Chem. 2019 Feb 22;7:94. doi: 10.3389/fchem.2019.00094 (PMC6395394; doi:10.3389/fchem.2019.00094)
Supplement: Supplementary file 1 [file Data_Sheet_1.docx]

**Supporting Information**

**A spectroscopic investigation of Eu3+ incorporation in *Ln*PO4 (*Ln* = Tb, Gd1–xLux, x = 0.3, 0.5, 0.7, 1) ceramics**

H. Lösch1, A. Hirsch2§, J. Holthausen3ǂ, L. Peters2, B. Xiao1, S. Neumeier3, M. Schmidt1, N. Huittinen1*

1Helmholtz–Zentrum Dresden–Rossendorf, Institute of Resource Ecology, Bautzner Landstraße 400, 01328 Dresden, Germany

2RWTH Aachen, Institut für Kristallographie, Jägerstraße 17–19, 52066 Aachen, Germany

3Forschungszentrum Jülich GmbH, Institute of Energy and Climate Research, Nuclear Waste Management and Reactor Safety (IEK–6), 52425 Jülich, Germany

§Current address: Fraunhofer Technology Centre Semiconductor Materials THM, Branch of the Fraunhofer Institute for Integrated Systems and Device Technology IISB, Department Materials, Group Silicon, Am St.–Niclas–Schacht 13, 09599 Freiberg/Sachsen, Germany

ǂCurrent address: ASK Chemicals GmbH, Reisholzstraße 16−18, 40721 Hilden, Germany

*Corresponding author :

Nina Huittinen

email : n.huittinen@hzdr.de

phone : +49 (0351) 260 2148

fax : +49 (0351) 260 13233

This Supporting Information contains 6 pages and 8 figures


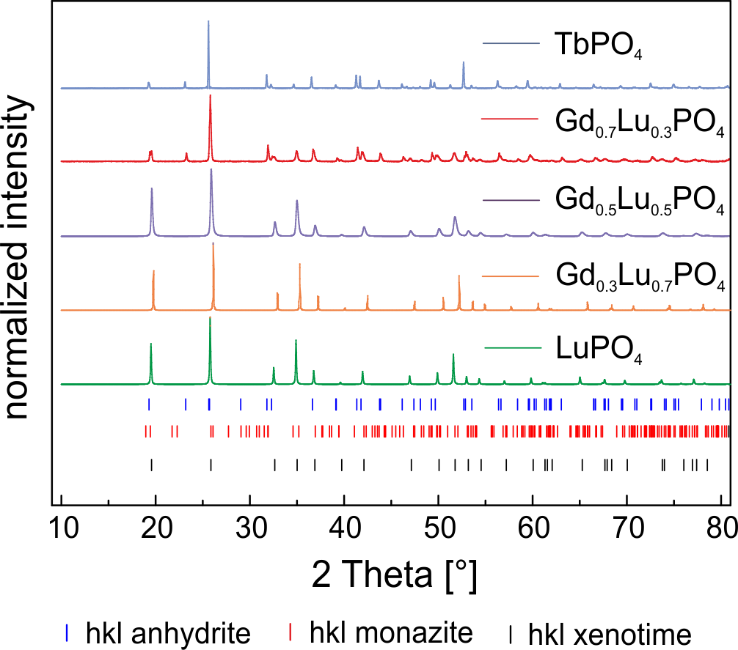


SI 1: PXRD patterns of Eu3+–doped TbPO4 and the solid solution series Gd1–xLuxPO4 (x = 0.3, 0.5, 0.7, 1) after synthesis.


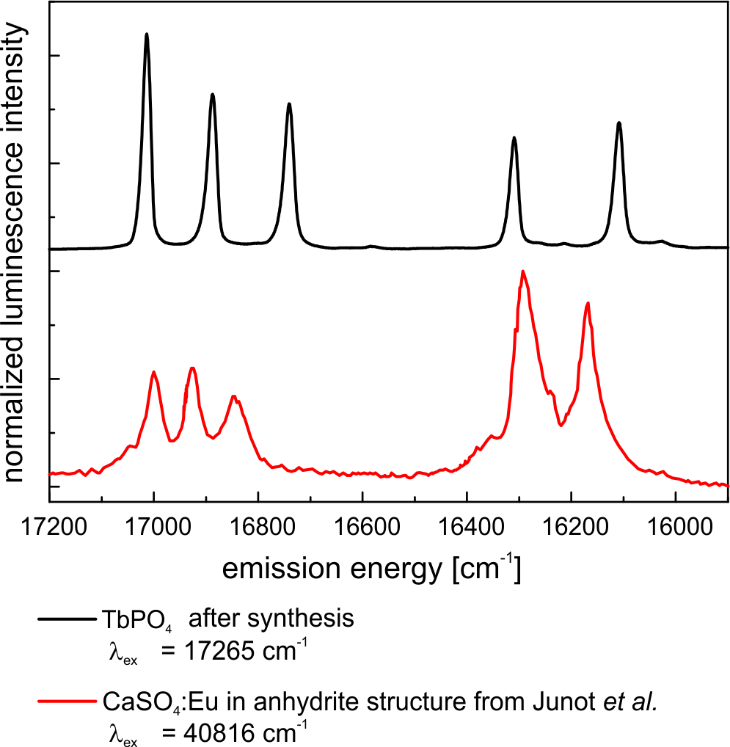


SI 2: Comparison of emission spectra of Eu3+–doped CaSO4 anhydrite, λex = 245nm (replot from (Junot *et al.*, 2014)) and Eu3+–doped TbPO4 in the anhydrite–like structure.


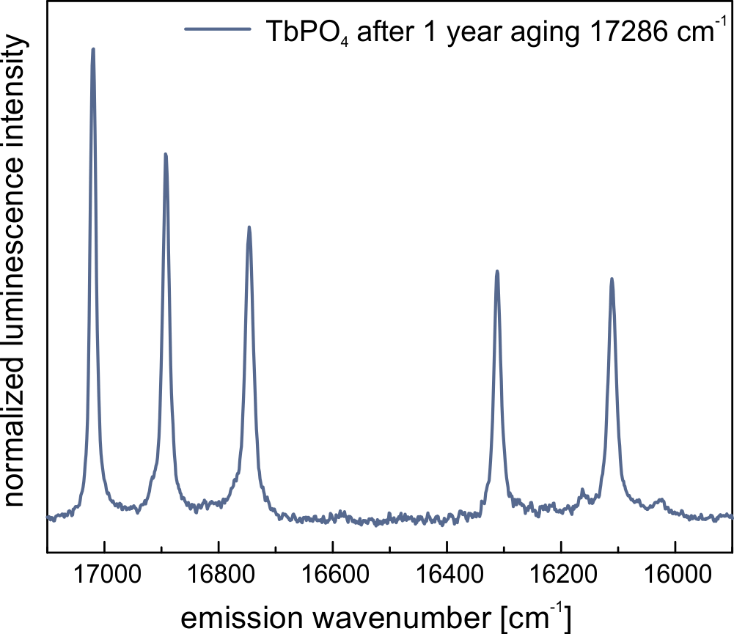


SI 3: Emission spectra of Eu3+‒doped TbPO4 after one year of aging, excited at 17268 cm–1.


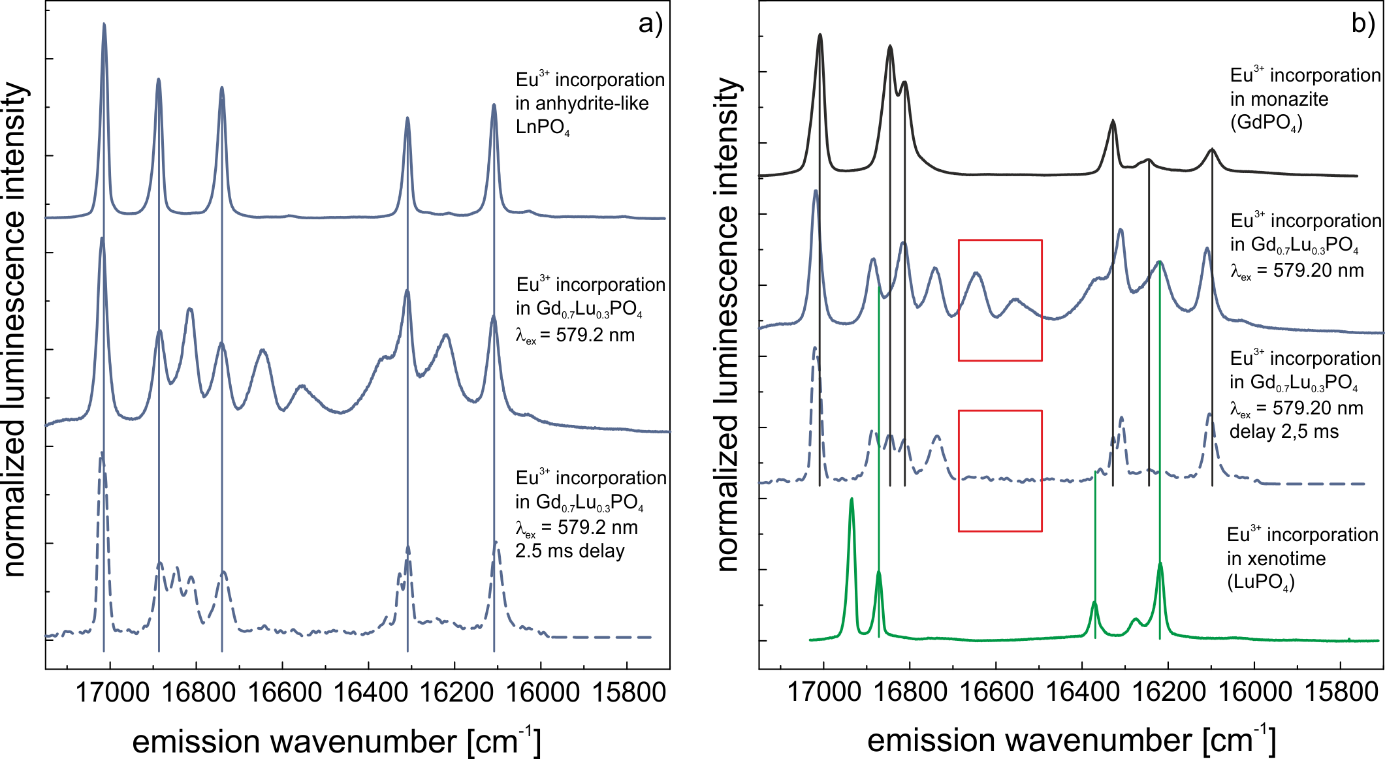


SI 4: Emission spectra of Eu3+ doped Gd0.7Lu0.3PO4 (λex = 17265 cm–1, delay = 10 μs or 2.5 ms) compared with a) Eu3+ incorporation in an anhydrite–like phase and b) Eu3+ incorporation in monazite (black traces) and xenotime (green traces) phase. The red box indicates Eu3+‒emission signals that cannot be ascribed to any of the *Ln*PO4 phases.


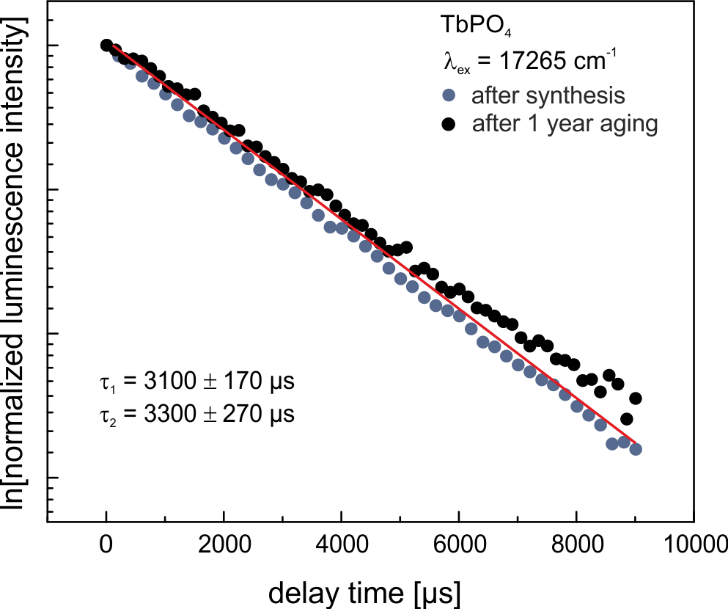


SI 5: Lifetimes of Eu3+–doped TbPO4 after synthesis (gray) and after one year of aging (black).


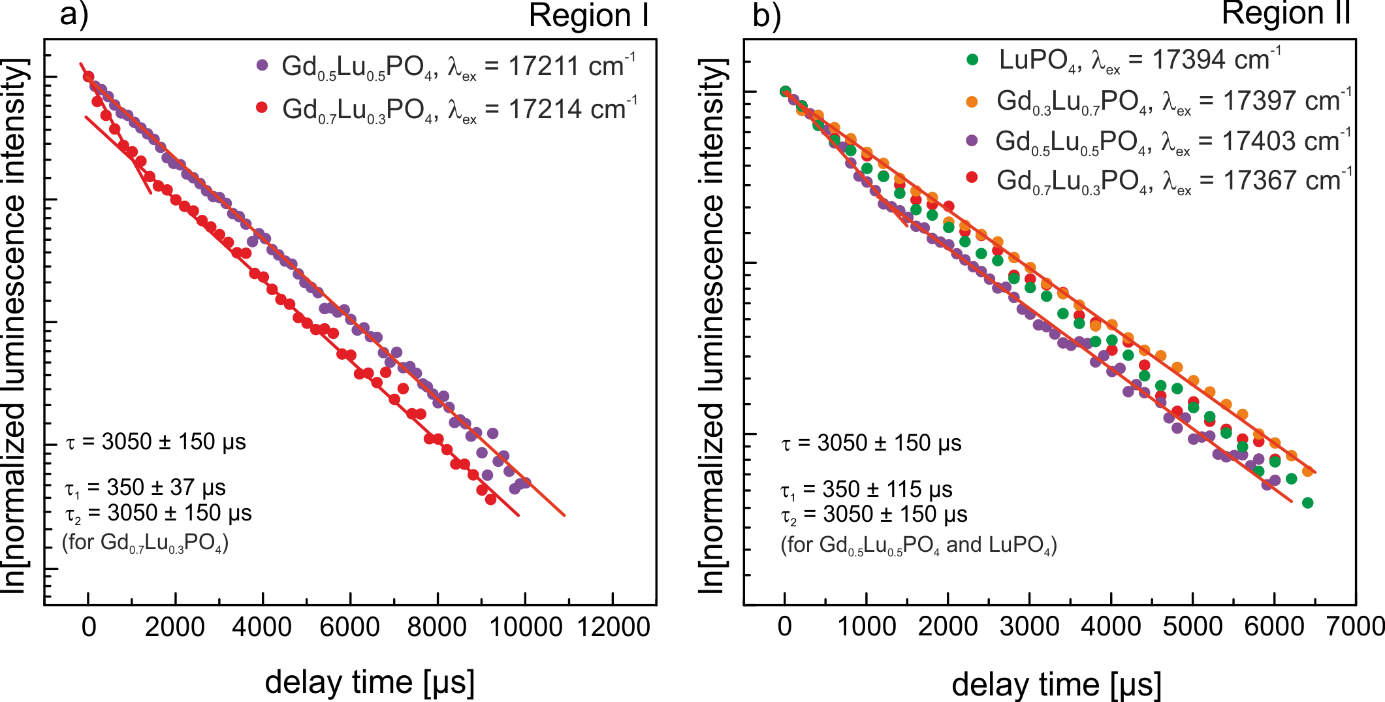


SI 6: Lifetimes of different Gd,Lu–solid solutions in a) Region I and b) Region II (right) after one year aging.


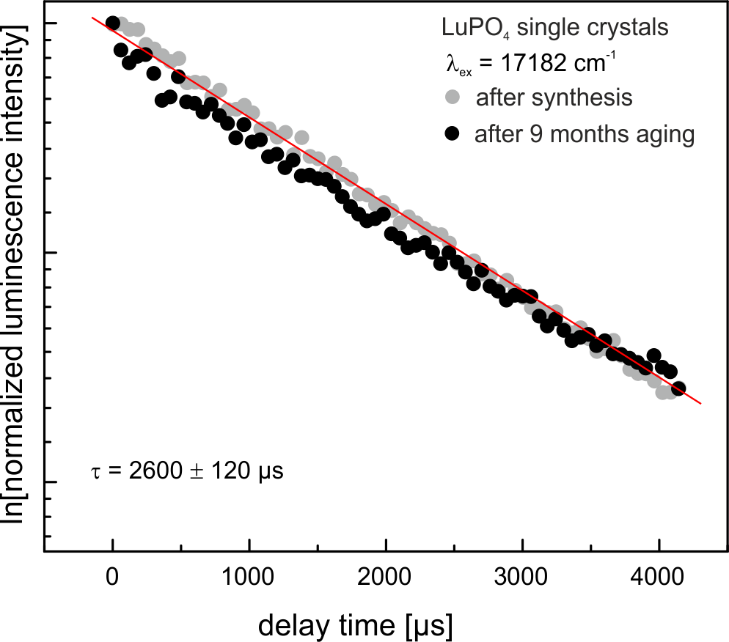


SI 7: Lifetimes of Eu3+‒doped LuPO4 single crystals direct after the synthesis (gray) and after 9 months of aging (black).


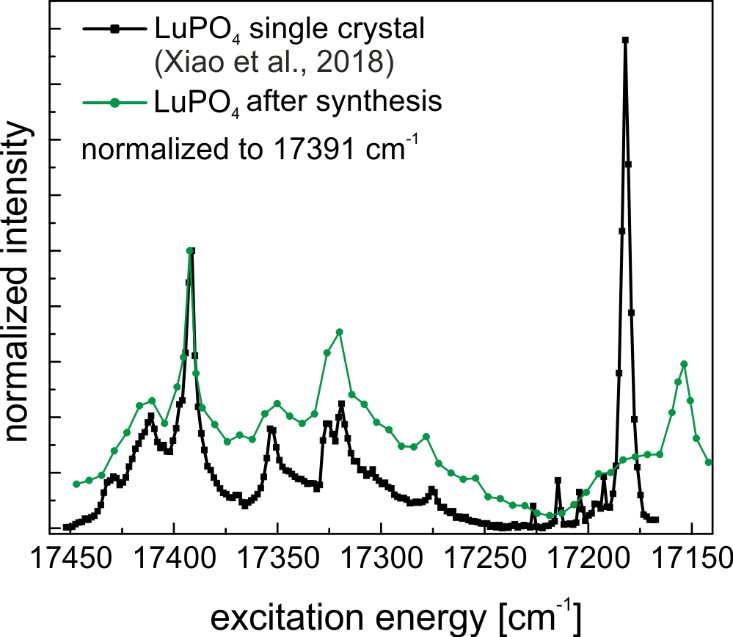


SI 8: Comparison of excitation spectra of LuPO4 powder and single crystal samples measured directly after synthesis. The single crystal data are taken from (Xiao *et al.*, 2018).

**References**

Junot, D.O., dos Santos, M.A.C., Antonio, P.L., Caldas, L.V., and Souza, D.N. (2014), Feasibility study of CaSO4: Eu, CaSO4:Eu, Ag and CaSO4:Eu, Ag (NP) as thermoluminescent dosimeters, Radiation Measurements, 71, 99-103, doi: 10.1016/j.jcis.2016.08.027.

Xiao, B., Lösch, H., Huittinen, N., and Schmidt, M. (2018), Local structural effects of Eu3+ incorporation into xenotime-type solid solutions with different host cations, Chemistry – A European Journal, 24(50), 13368-13377, doi: 10.1002/chem.201802841.
